# Supplementary material for: Estimation of bisulfate in edible plant foods, dog urine, and drugs: picomolar level detection and bio-imaging in living organisms
Source: Royal Society of Chemistry journal article supplement (doi:10.1039/c9an01078e), 2019-01-01
Supplement: c9an01078e1.pdf [file c9an01078e1.pdf]

## **Electronic Supplementary Information**

### **Estimation of bisulfate in edible plant foods, dog urine, and drug: Picomolar level detection and bio-imaging in living organisms**

**Ratish R. Nair, M. Raju, Surjit Bhai, Ishan H. Raval, Soumya Haldar,**

**Bishwajit Ganguly, \* and Pabitra B. Chatterjee\***

Analytical and Environmental Science Division and Centralized Instrument Facility,

CSIR-CSMCRI, G. B. Marg, Bhavnagar, India.

Academy of Scientific and Innovative Research (AcSIR),

CSIR-CSMCRI, G. B. Marg, Bhavnagar, India.

**Corresponding author: [pbchatterjee@csmcri.res.in](mailto:pbchatterjee@csmcri.res.in)**

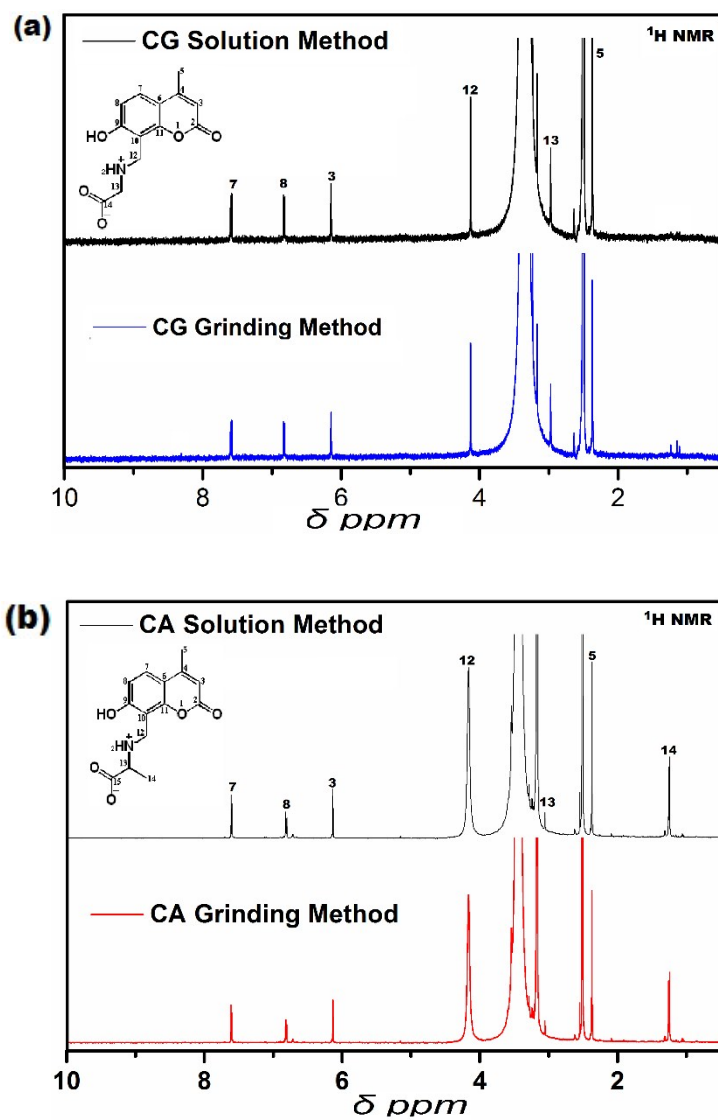

**Fig. S1** <sup>1</sup>H NMR spectra of (a) CG and (b) CA, recorded in DMSO-d<sub>6</sub>.

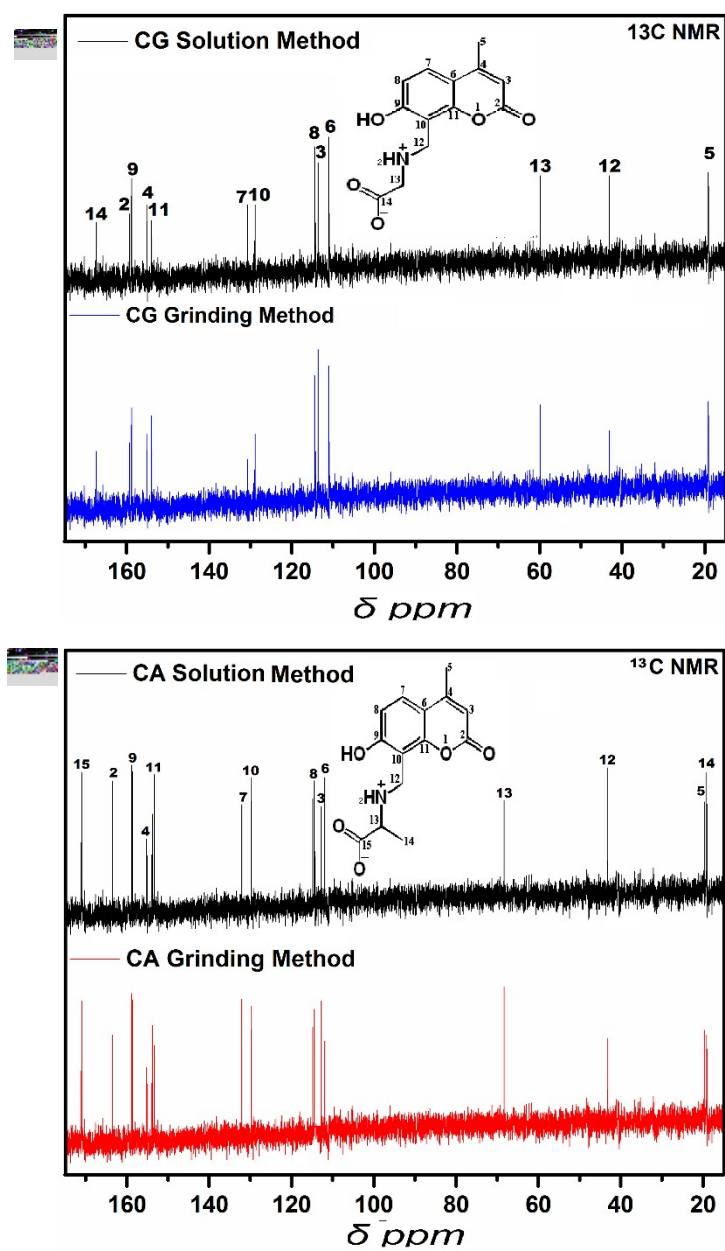

**Fig. S2**  $^{13}\text{C}$  NMR spectral stacks of (a) CG and (b) CA, recorded in  $\text{H}_2\text{O}$ .

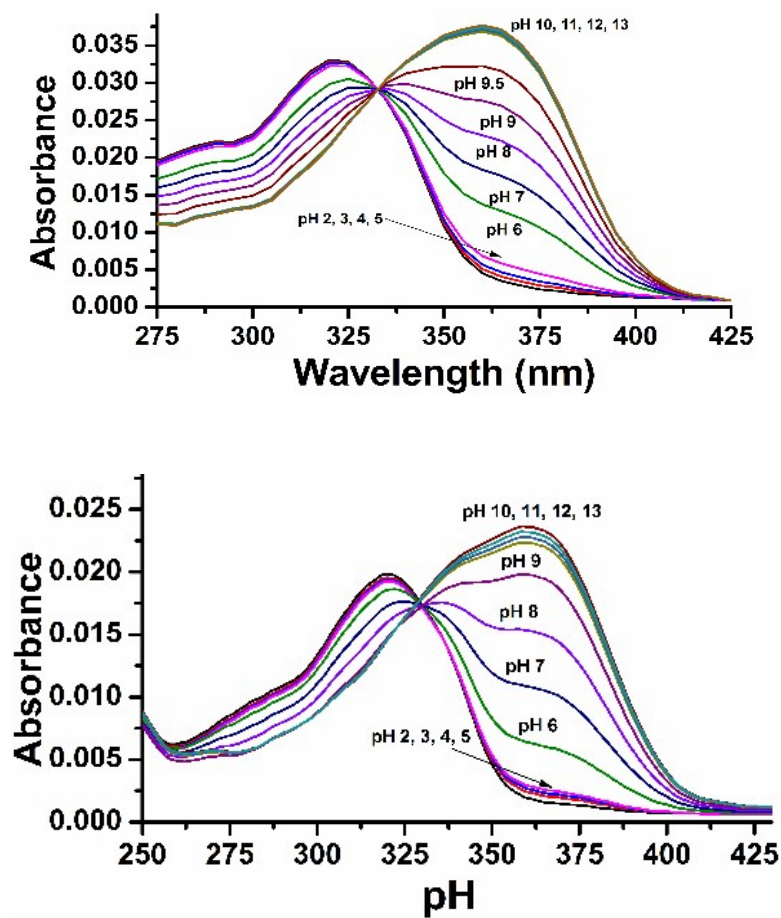

**Fig. S3** Absorbance of CG (top) and CA (bottom) at different pHs. Solutions pH was varied between 2 and 13. Solutions of CG and CA were prepared in 100 % water.

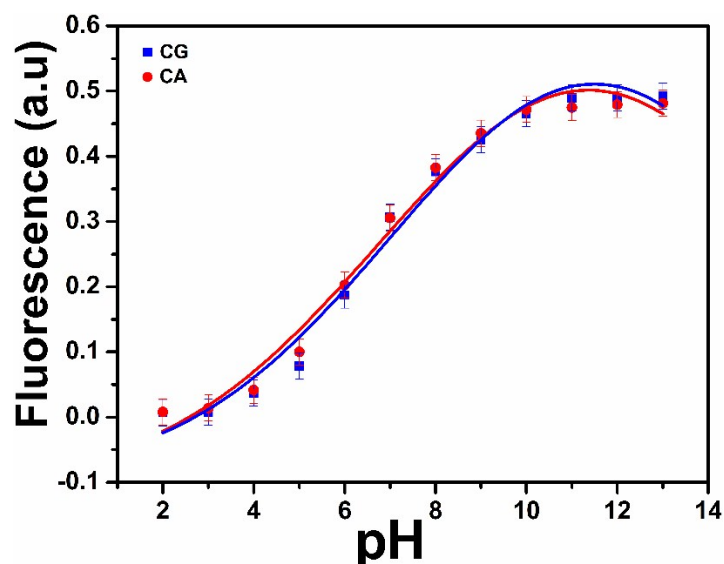

**Fig. S4** Change of fluorescence peak intensities of CG and CA with pH of the aqueous solutions.  $\lambda_{\text{exi}} = 360$  nm and  $\lambda_{\text{emi}} = 448$  nm. The error bars indicate the standard deviations of three data points.

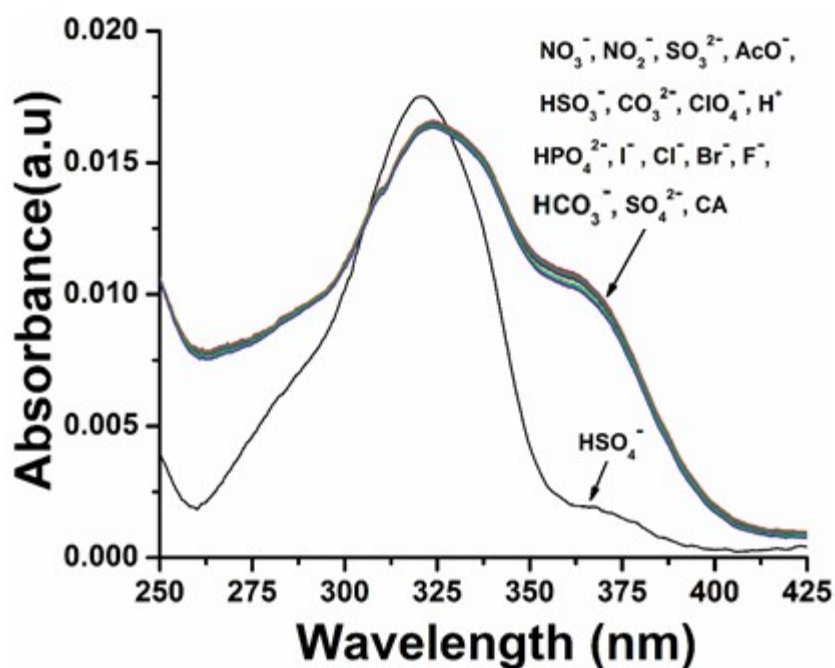

**Fig. S5** Absorbance based selectivity plots of CA (10  $\mu\text{M}$ ) in 50 mM HEPES aqueous buffer at physiological pH (7.4). Resulting concentrations of various anion solutions is 2.5 mM, excepting bisulfate in which case, it is 25 nM.

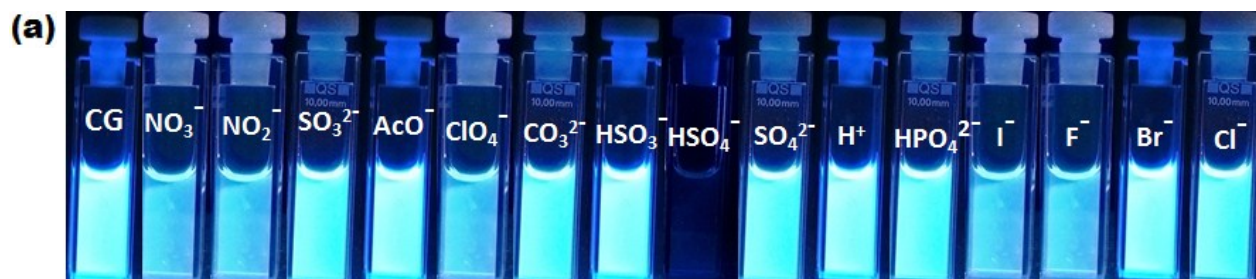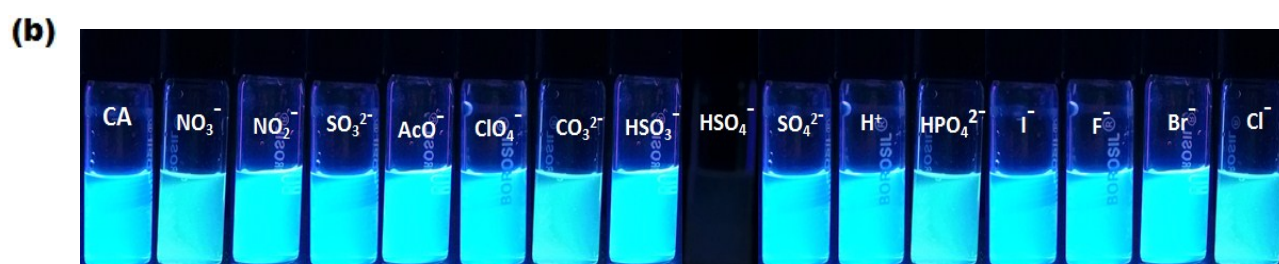

**Fig. S6** Naked eye detection of HSO<sub>4</sub><sup>-</sup> under UV lamp (365 nm) using aqueous HEPES buffer (pH=7.4) of (a) CG and (b) CA.

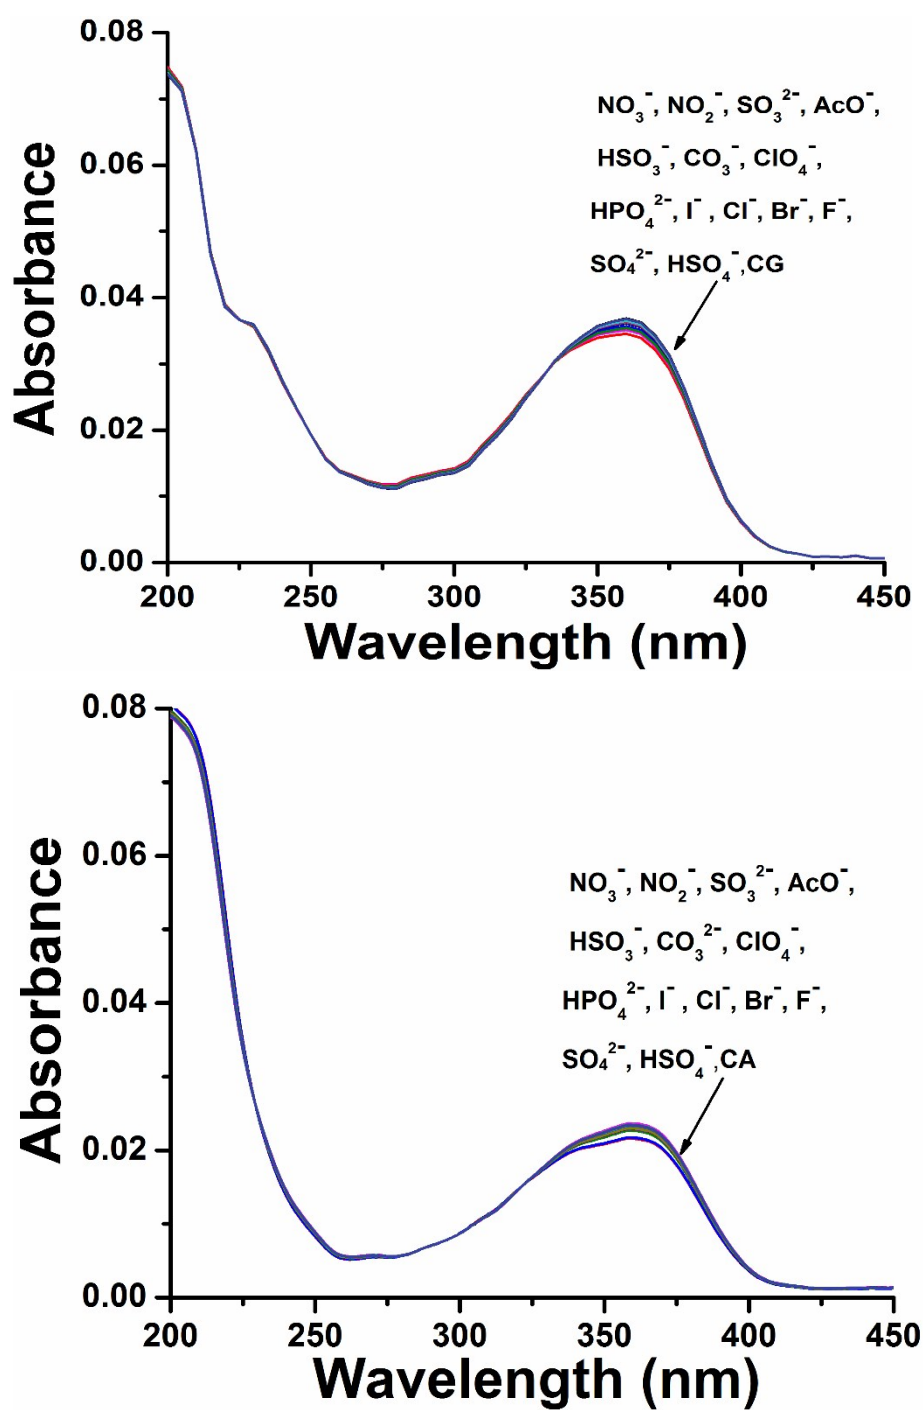

**Fig. S7** Absorbance based selectivity plots of 20  $\mu\text{M}$  CG/CA in aqueous  $\text{CO}_3^{2-}/\text{HCO}_3^-$  buffer (20 mM) at pH 10.5. Stock concentration of each anion is 2 mM.

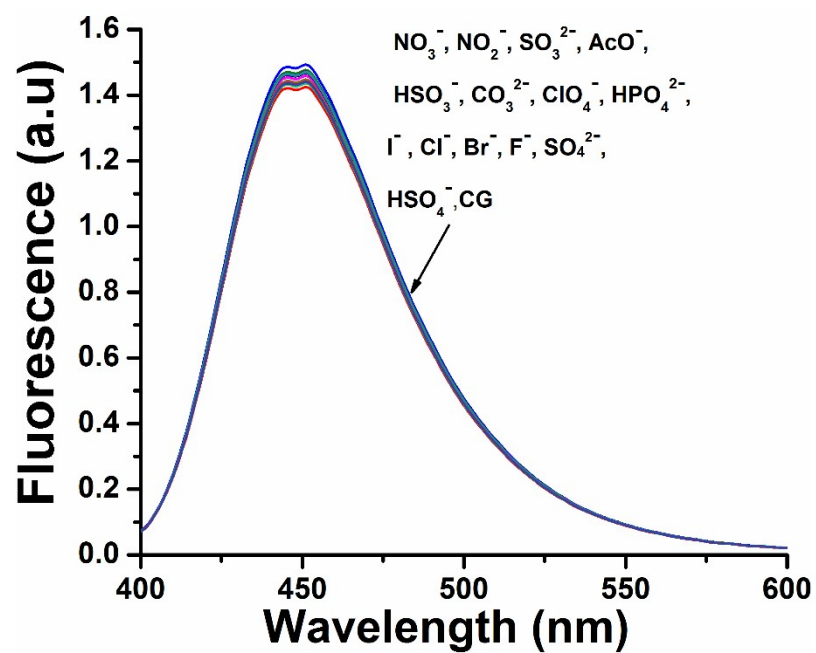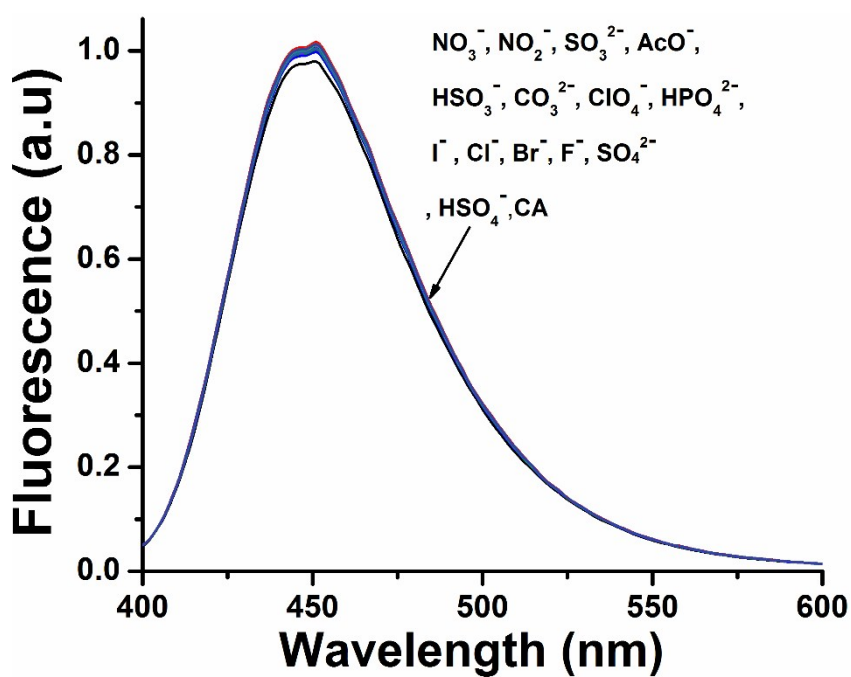

**Fig. S8** Emission based selectivity profiles of 10  $\mu\text{M}$  CG/CA in 20 mM aqueous  $\text{CO}_3^{2-}/\text{HCO}_3^-$  buffer at pH 10.5. Stock concentration of each anion is 2 mM.



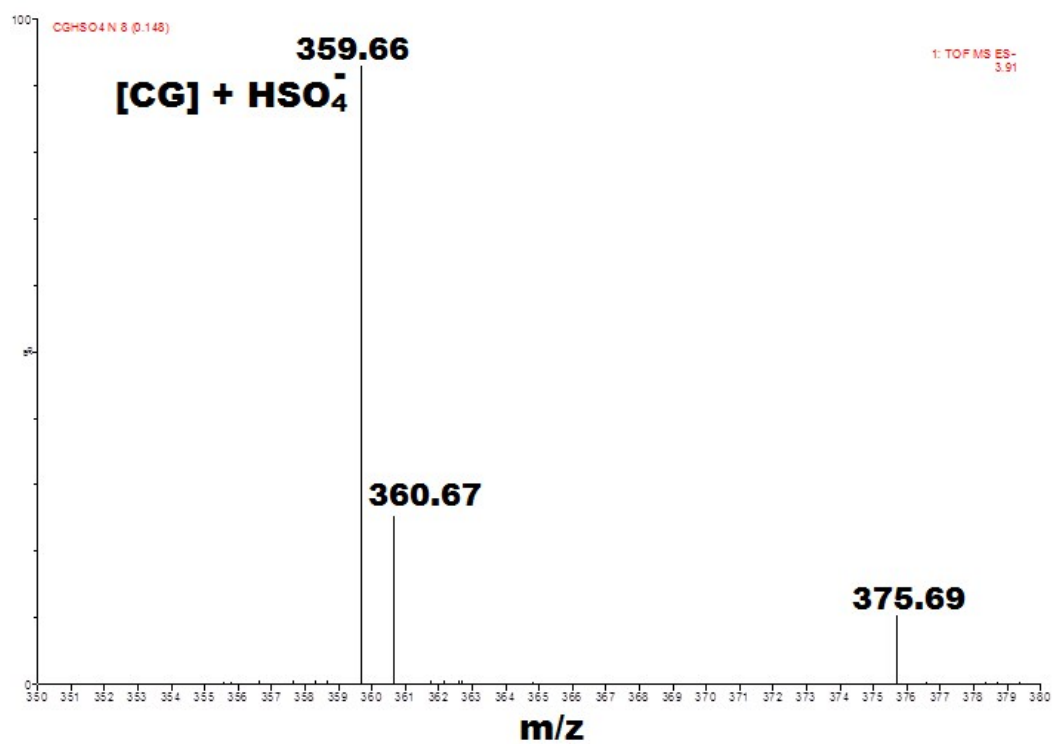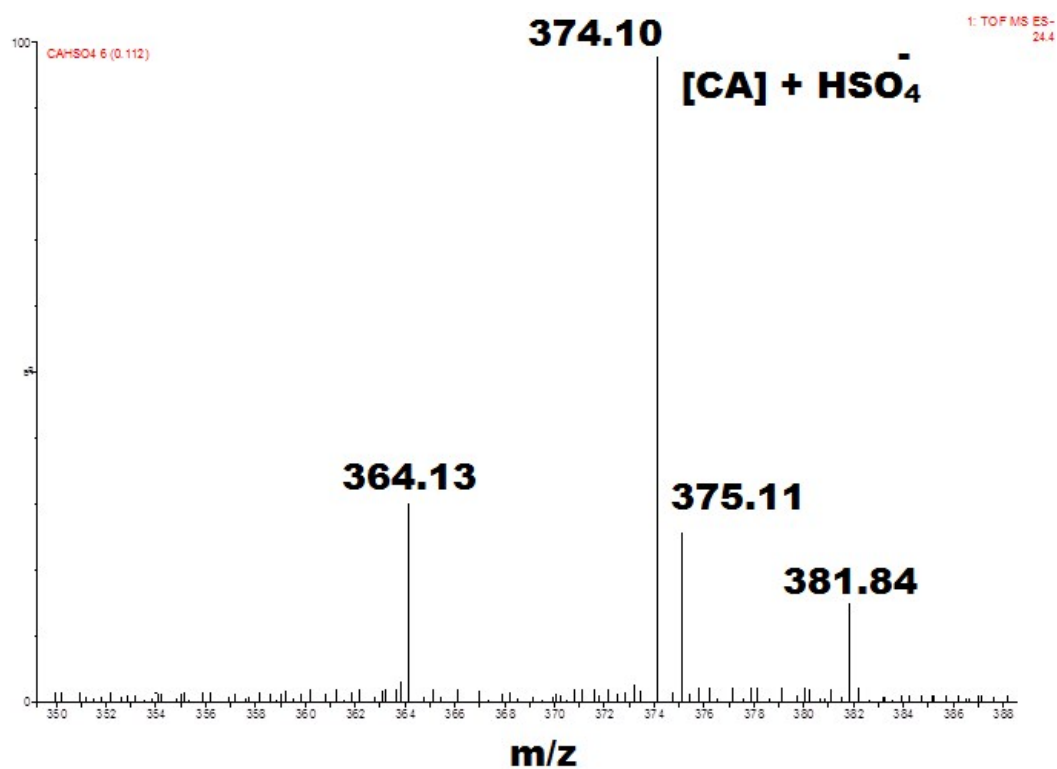

**Fig. S9** ESI-MS spectra of (a) [CG] + [HSO<sub>4</sub><sup>-</sup>] and (b) [CA] + [HSO<sub>4</sub><sup>-</sup>] in the negative ion mode, recorded in water.

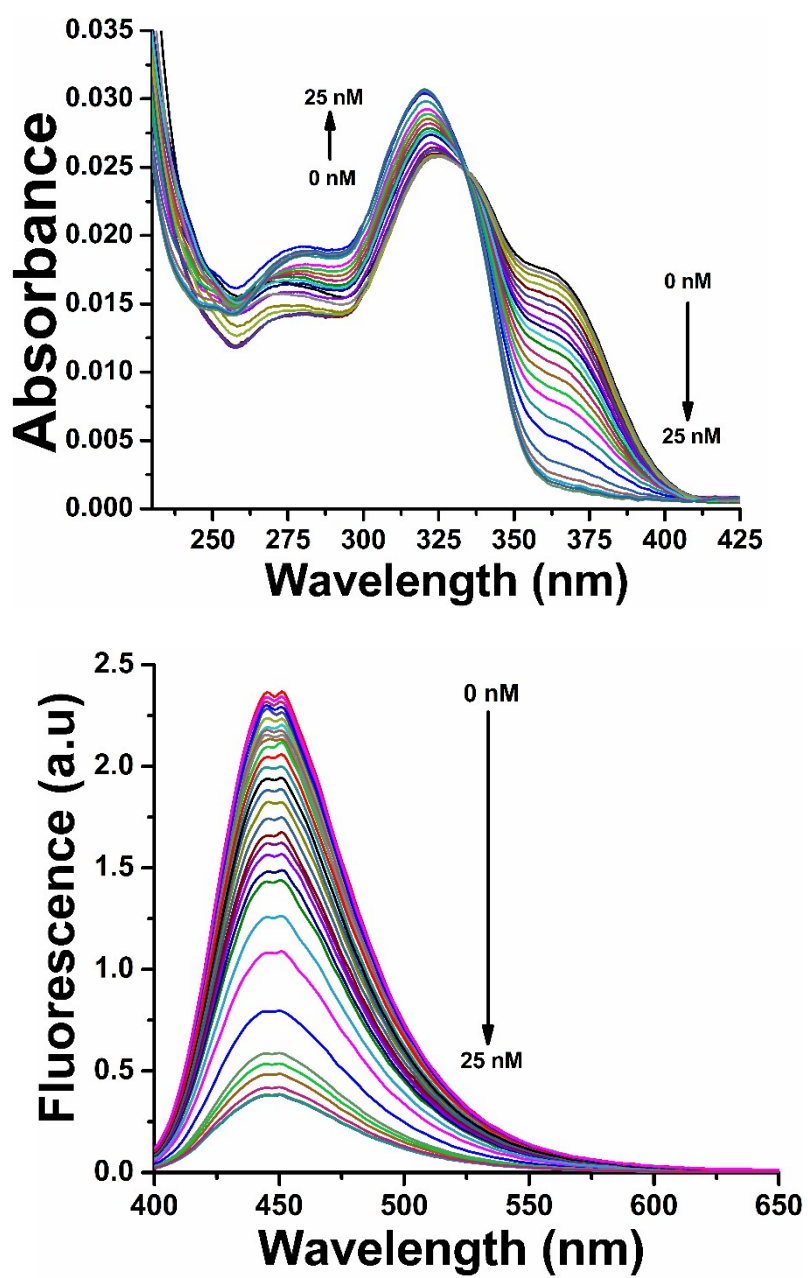

**Fig. S10** Absorption (top) and fluorescence (bottom) titration profiles of CG upon addition of increasing concentrations of  $\text{HSO}_4^-$  (0-25 nM) in 50 mM aqueous HEPES buffer solution at pH 7.4.  $\lambda_{\text{exi}} = 360$  nm.

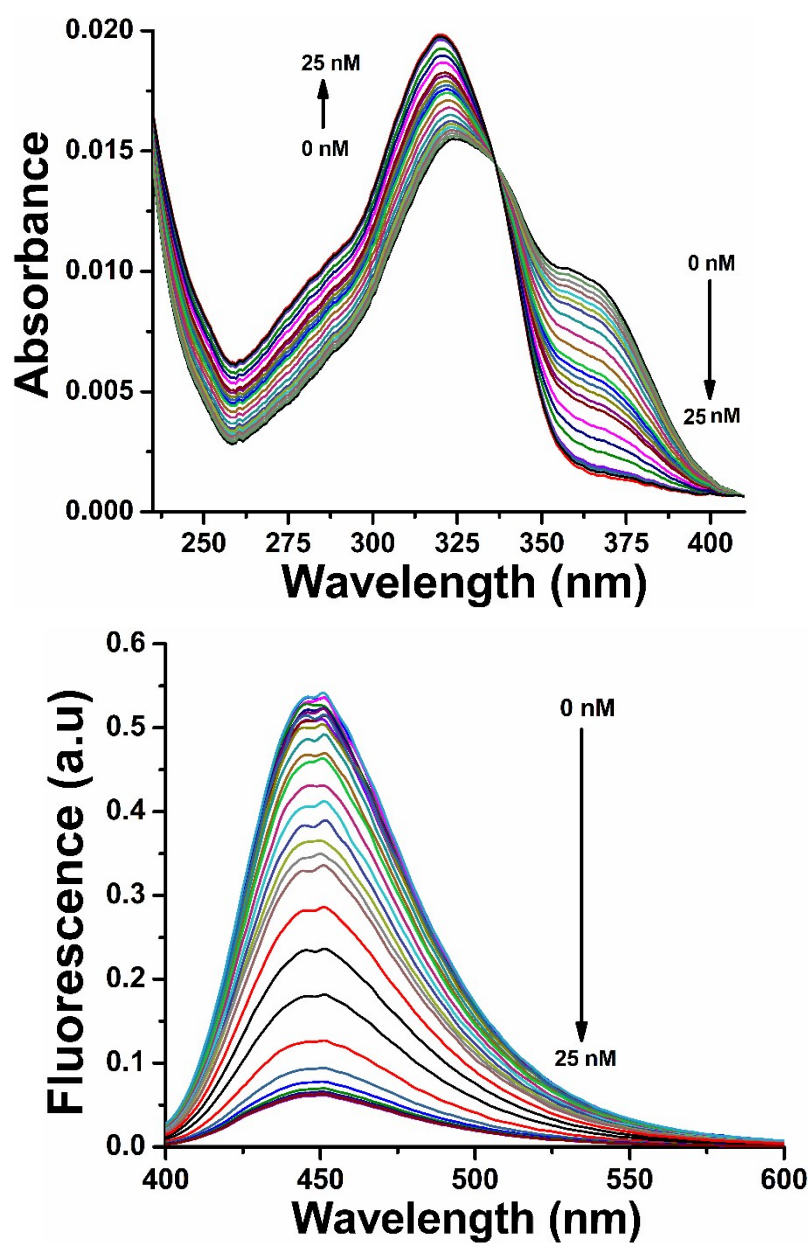

**Fig. S11** Absorption (top) and fluorescence (bottom) titration profiles of CA upon addition of increasing concentrations of  $\text{HSO}_4^-$  (0-25 nM) in 50 mM HEPES aqueous buffer solution at pH 7.4.  $\lambda_{\text{exi}} = 360$  nm.

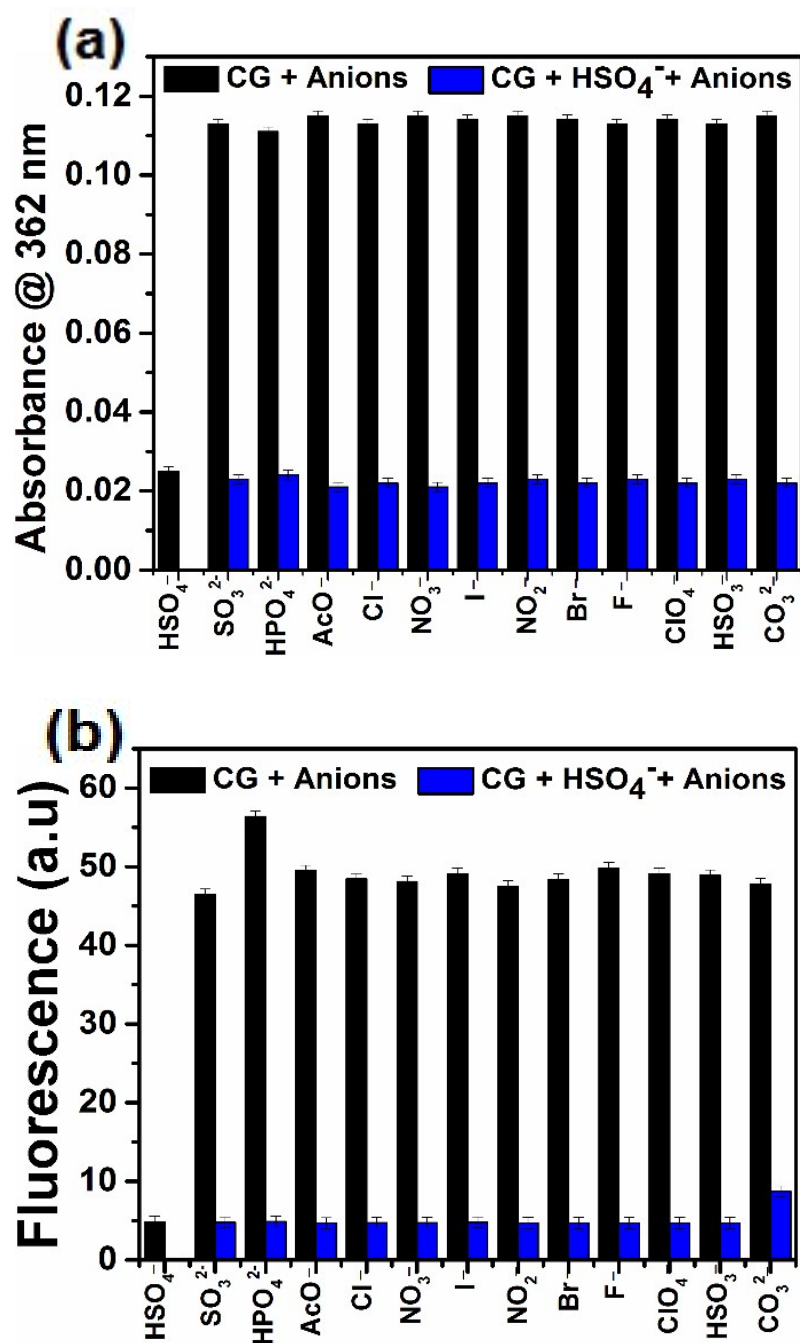

**Fig. S12** Results from interference studies based on (a) UV-vis and (b) fluorescence of CG (10  $\mu$ M). 50 mM aqueous HEPES buffer in presence of 25 nM bisulfate plus each of the other anions (250 times of the probe) was used in this study. Error bars indicate standard deviations of three data sets.

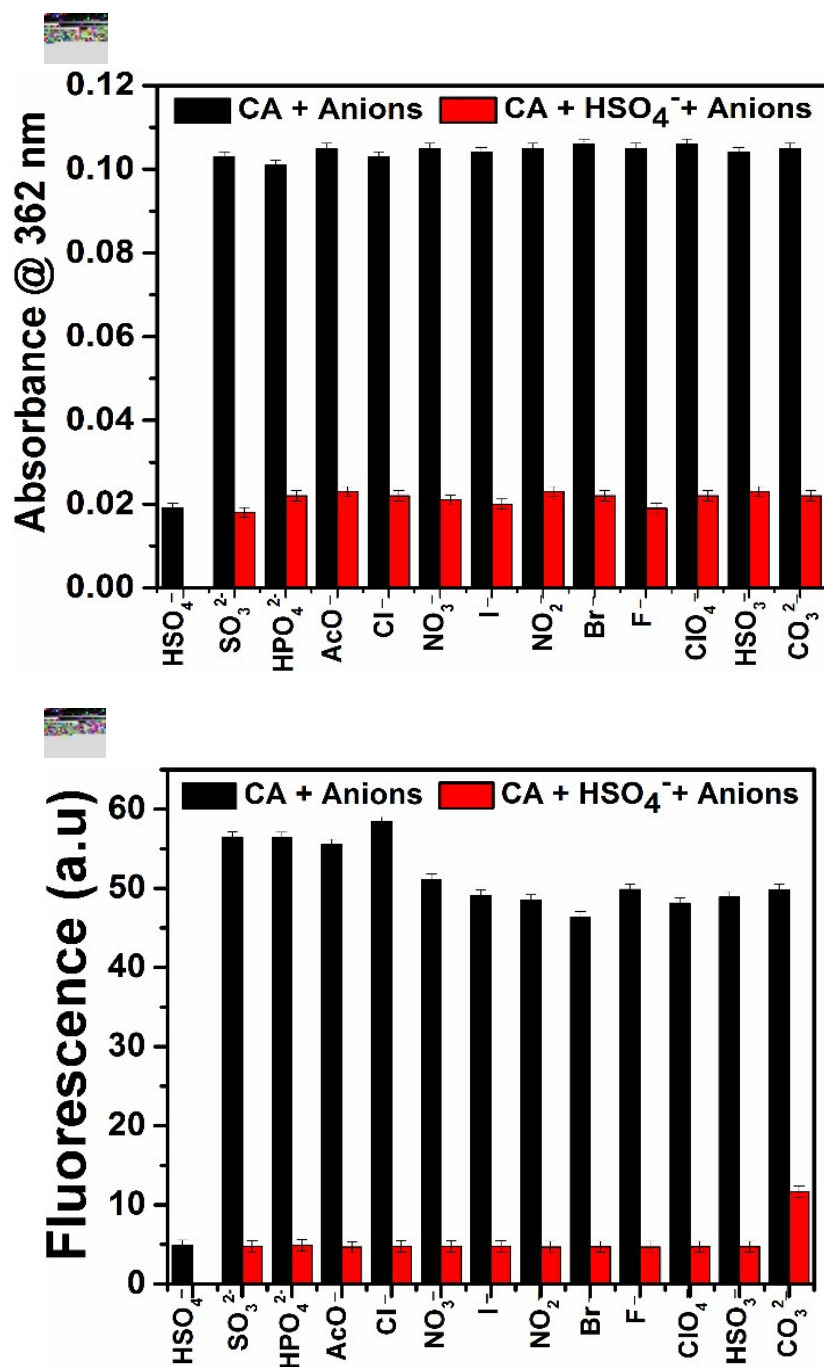

**Fig. S13** Results from interference studies of 10 μM CA, which are based on (a) UV-vis and (b) fluorescence. 50 mM aqueous HEPES buffer in presence of bisulfate (25 nM) plus each of the other anions (250 times of the probe) was used in this study. Error bars indicate standard deviations of three data sets.

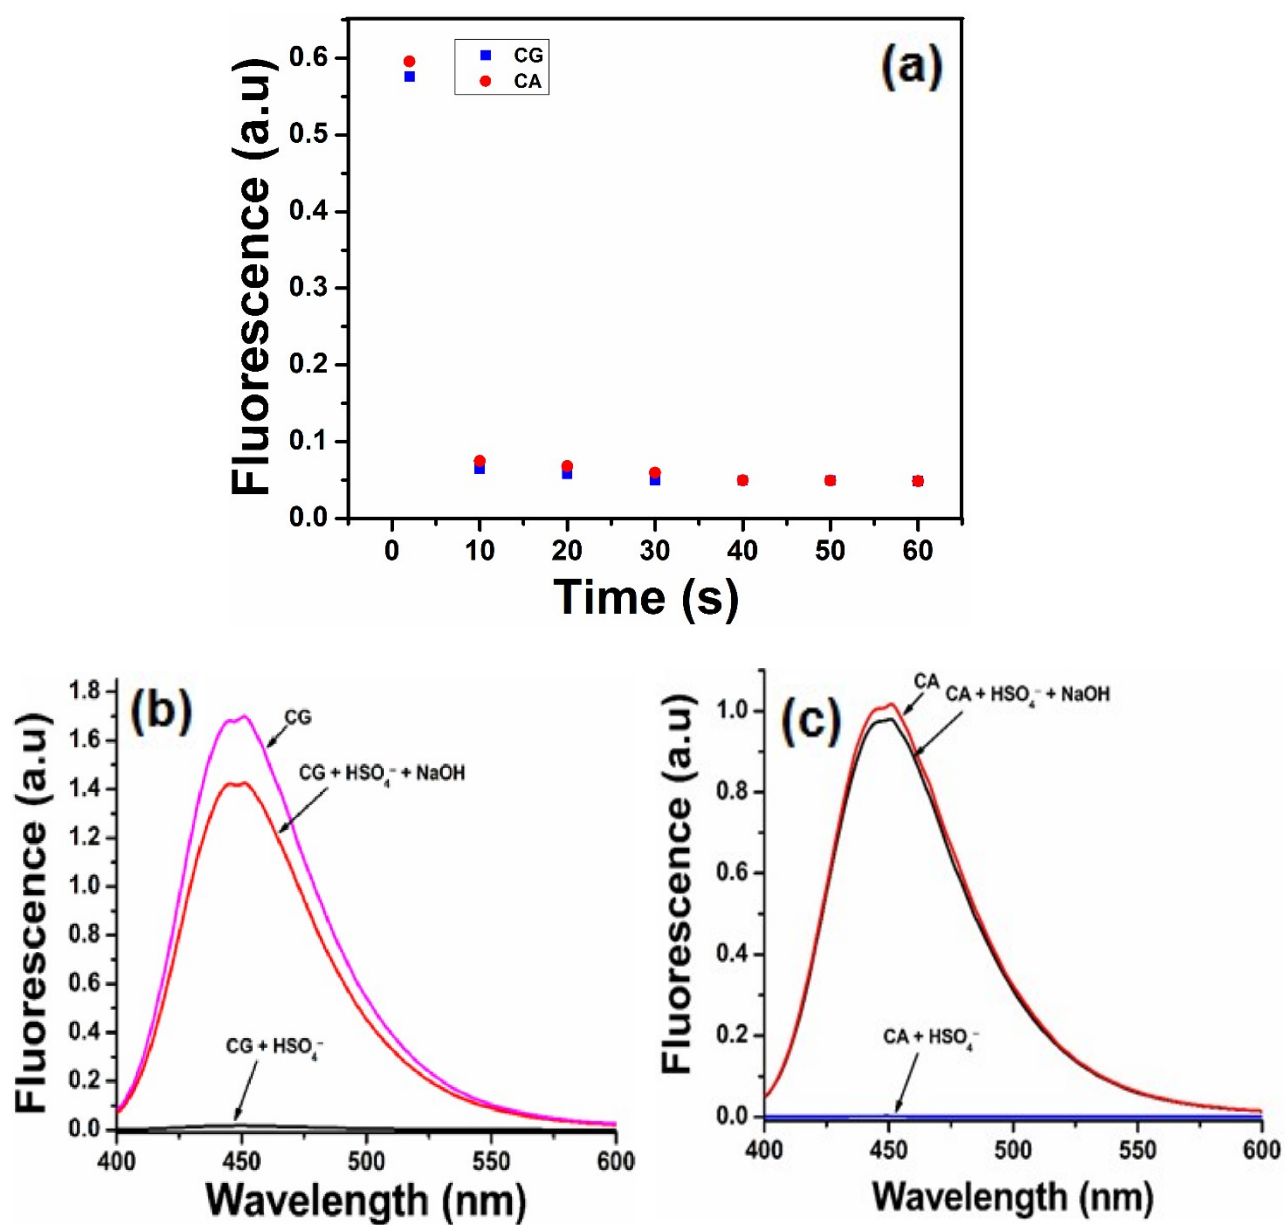

**Fig. S14** (a) Time response plots of 10  $\mu\text{M}$  CG and CA (50 mM HEPES buffer) in presence of 25 nM  $\text{HSO}_4^-$  at  $\lambda_{\text{emi}}=448$  nm. Reversible behaviour of CG (b) and CA (c) in case of  $\text{HSO}_4^-$  detection.

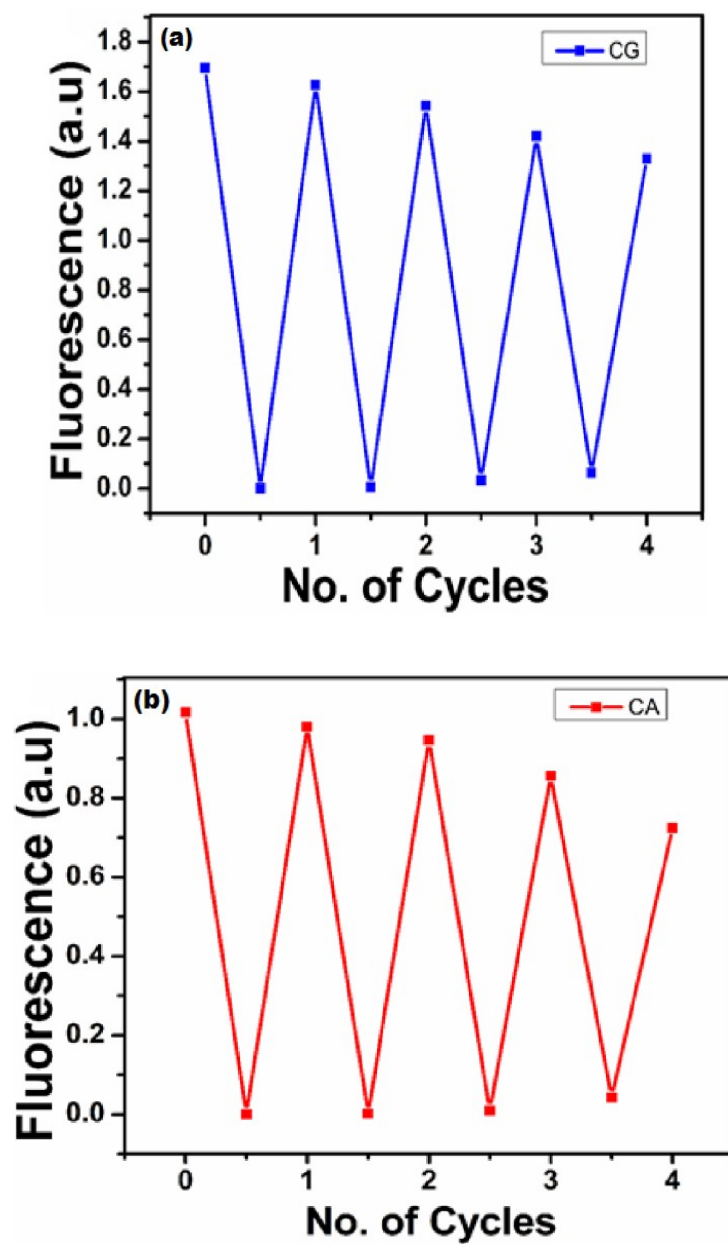

**Fig. S15** Recyclability plots of (a) CG and (b) CA in the detection of  $\text{HSO}_4^-$  using  $\text{OH}^-$  and the probe, alternatively.

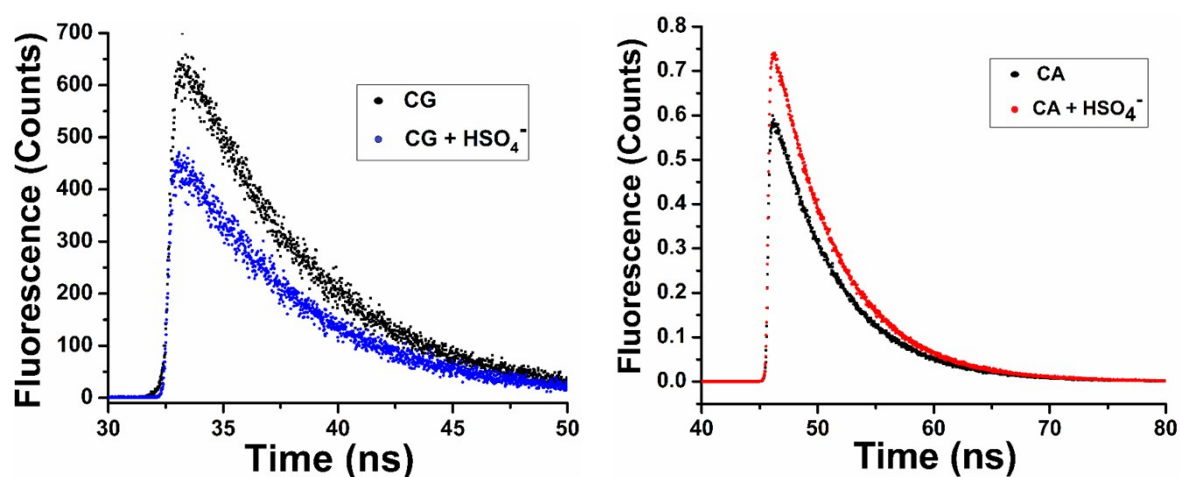

**Fig. S16** Time correlated single photon counting (TCSPC) plots of 10  $\mu\text{M}$  CG (left) and 10  $\mu\text{M}$  CA (right) in aqueous HEPES buffer in absence and presence of 5 nM  $\text{HSO}_4^-$ .

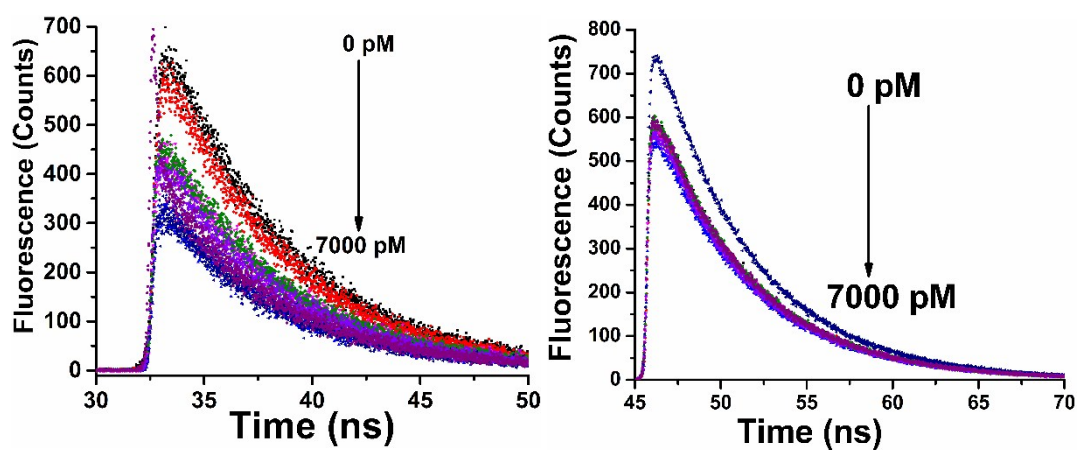

**Fig. S17** Time correlated single photon counting (TCSPC) titration plots of 10  $\mu\text{M}$  CG (left) and 10  $\mu\text{M}$  CA (right) in aqueous HEPES buffer with increasing concentrations of  $\text{HSO}_4^-$  (0 to 7000 pM).



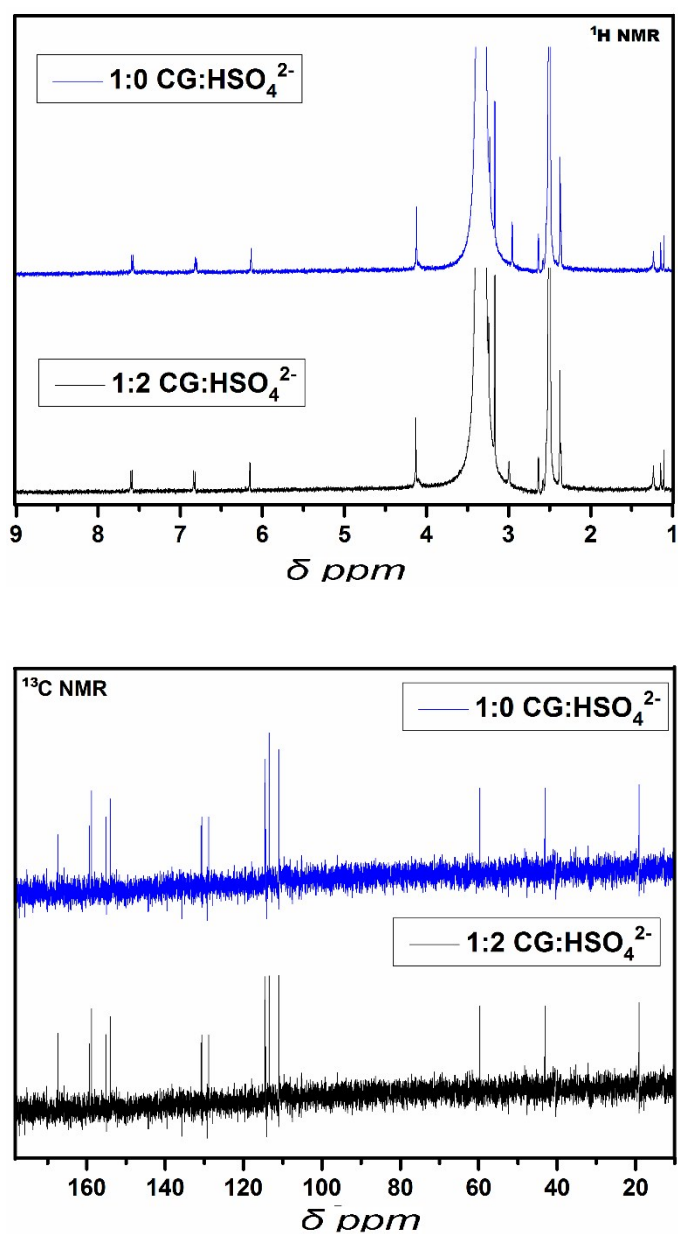

**Fig. S18.** NMR titration stack plots for (a)  $^1\text{H}$  NMR of CG and (b)  $^{13}\text{C}$  NMR of CG, recorded in  $\text{DMSO-d}_6$  and water, respectively.

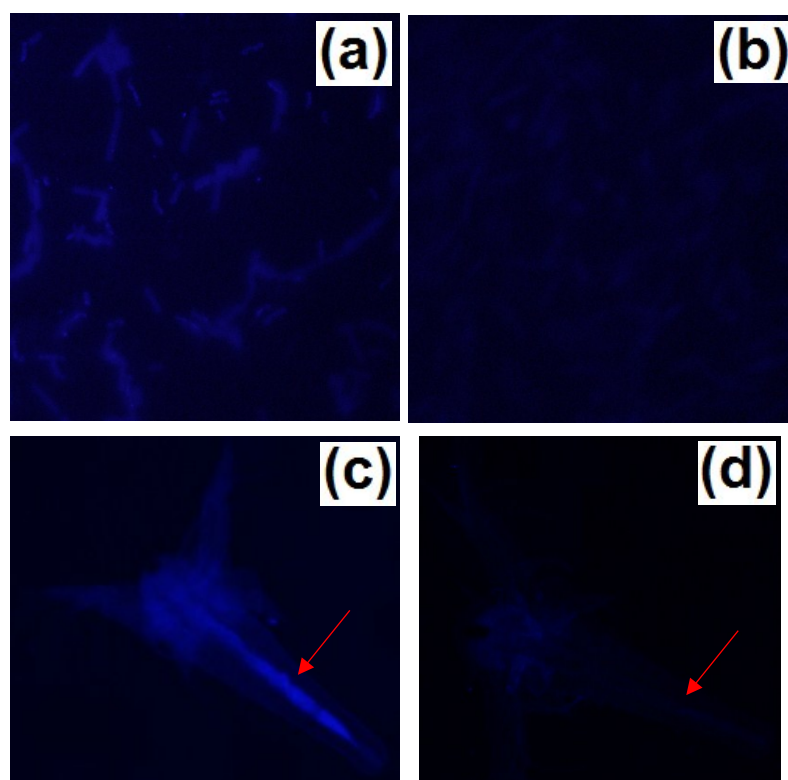

**Fig. S19** Fluorescence microscopy images of *Bacillus subtilis* exposed to (a) 10  $\mu$ M CG and (b) 10  $\mu$ M CG plus 20 nM bisulfate. Fluorescence microscopy images of live whole *Artemia* (one day aged) after exposing to (c) 20  $\mu$ M CG solution and (d) 20  $\mu$ M aqueous solution of CG followed by the addition of 20 nM bisulfate solution. Arrows indicate the positions of the GI-tracts of the shrimps.

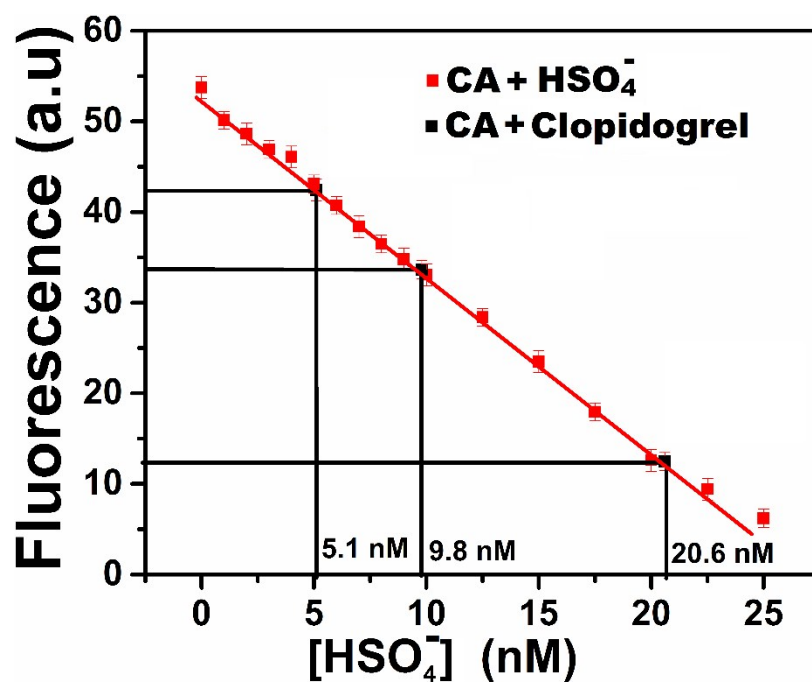

**Fig. S20** Estimations of bisulfate in clopidogrel drug using standard plot of CA. Samples were titrated against 10  $\mu\text{M}$  CA (in HEPES aqueous buffer at pH 7.4). Calculated concentrations of bisulfate produced from the drug clopidogrel are 5, 10, and 20 nM, respectively. Error bars indicate standard deviations of three data sets.

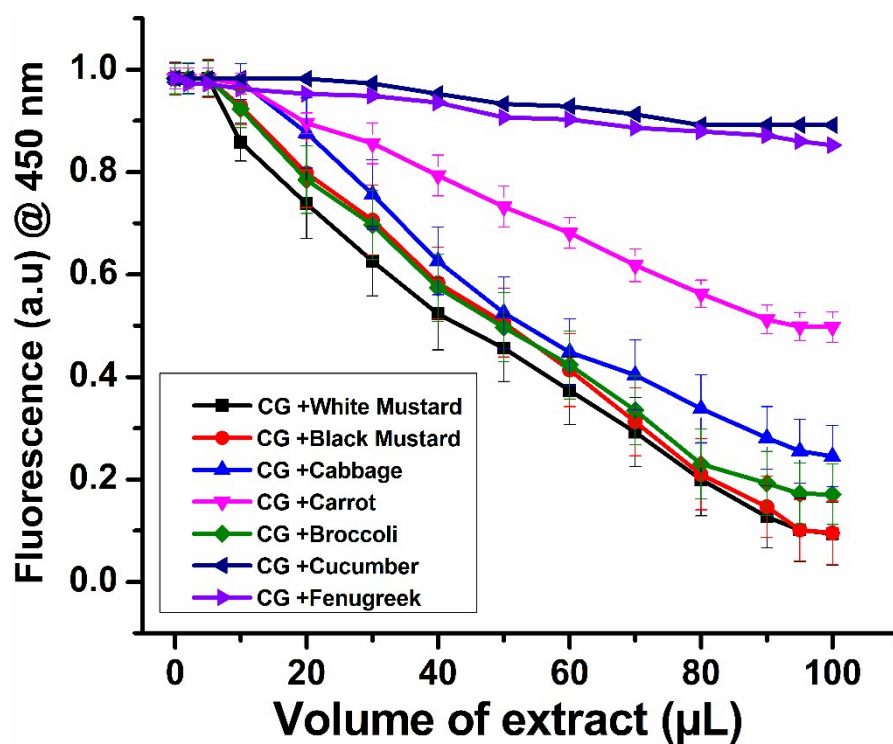

**Fig. S21** Measurement of concentrations of bisulfate in different vegetables and seeds using the standard plot of CG. Samples were titrated against 10  $\mu$ M CG (in HEPES buffer at pH 7.4). Error bars indicate standard deviations of three data sets.

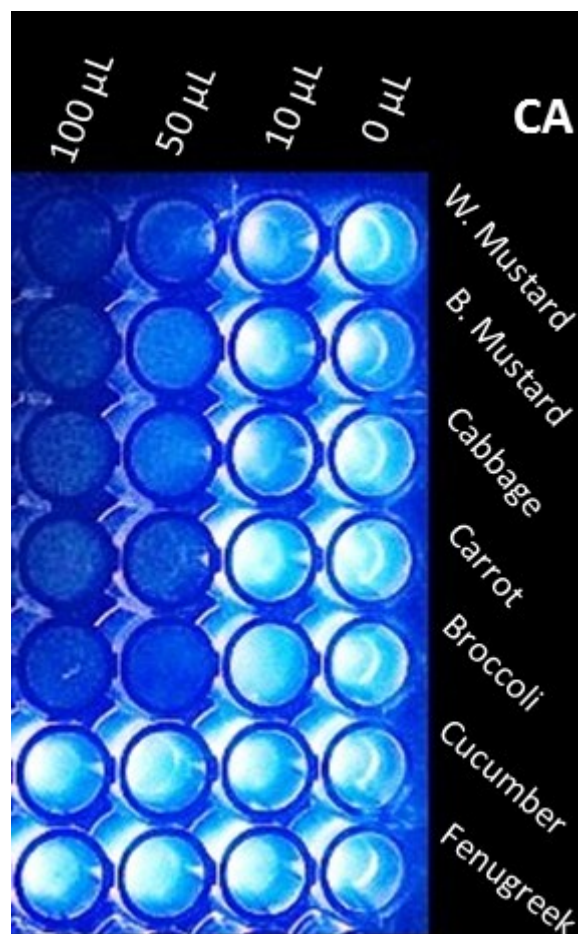

**Fig. S22** Partial view of 96 well-plate showing the fluorescence changes of CA with the addition of varying volumes of aqueous extracts of different seeds and cruciferous vegetables. Samples were studied against 10  $\mu$ M CA (dissolved in HEPES buffer at pH 7.4).

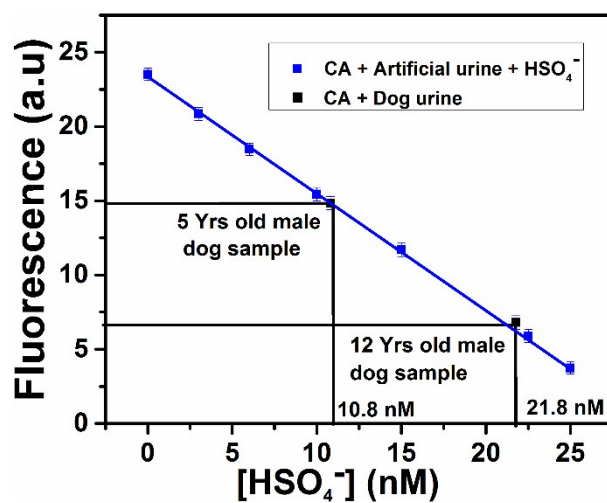

**Fig. S23** Estimation of concentrations of bisulfate in dog urine samples using standard plot of CG produced from artificial urine samples. Samples were titrated against 10  $\mu$ M CG (in HEPES buffer at pH 7.4). Error bars indicate standard deviations of three data sets.

**Table S1.** Results of toxicity studies of CG/CA with living brine shrimp *Artemia* based on % mortality counts.

| Experiment                           | Percentage of mortality |       |       |      |
|--------------------------------------|-------------------------|-------|-------|------|
|                                      | Set 1                   | Set 2 | Set 3 | Mean |
| Control<br>(in absence of any probe) | 0                       | 0     | 0     | 0    |
| CG (10 $\mu$ M)                      | 1                       | 0     | 0     | 0.22 |
| CG (20 $\mu$ M)                      | 2                       | 2     | 1     | 1.66 |
| CA (10 $\mu$ M)                      | 1                       | 1     | 0     | 0.66 |
| CA (20 $\mu$ M)                      | 2                       | 3     | 2     | 2.33 |

**Table S2.** Toxicity results of CG/CA against *Basillus subtilis* (CFU/mL).

| Experiment                           | Counts of <i>Basillus subtilis</i> |
|--------------------------------------|------------------------------------|
| Control<br>(in absence of any probe) | $8.3 \times 10^9$                  |
| CG (20 $\mu$ M)                      | $7.4 \times 10^9$                  |
| CA (20 $\mu$ M)                      | $5.8 \times 10^9$                  |

**Table S3.** Estimation of bisulfate present in the drug clopidogrel bisulfate by CG and CA.

| Receptor        | Calculated concentrations (nM) | Found concentrations (nM) | Recovery (%) |
|-----------------|--------------------------------|---------------------------|--------------|
| CG (10 $\mu$ M) | 5                              | $4.9 \pm 0.2$             | 98           |
|                 | 10                             | $10.1 \pm 0.2$            | 101          |
|                 | 20                             | $20.4 \pm 0.2$            | 102          |
| CA (10 $\mu$ M) | 5                              | $5.1 \pm 0.1$             | 102          |
|                 | 10                             | $9.8 \pm 0.1$             | 98           |
|                 | 20                             | $20.6 \pm 0.1$            | 103          |

**Table S4.** Estimation of bisulfate present in dog urine samples.

| <b>Probe</b>    | <b>Fluorescence intensity of 5 years old male dog's urine sample</b> | <b>Concentration of bisulfate found in 5 years old dog's urine sample</b> | <b>Fluorescence intensity of urine sample of 12 years old male dog</b> | <b>Concentration of bisulfate found in the urine sample of 12 years old dog</b> |
|-----------------|----------------------------------------------------------------------|---------------------------------------------------------------------------|------------------------------------------------------------------------|---------------------------------------------------------------------------------|
| CG (10 $\mu$ M) | 88085 $\pm$ 4000                                                     | 10.8 $\pm$ 0.3 nM                                                         | 168460 $\pm$ 4100                                                      | 21.8 $\pm$ 0.3 nM                                                               |
| CA (10 $\mu$ M) | 35207 $\pm$ 860                                                      | 10.5 $\pm$ 0.2 nM                                                         | 14302 $\pm$ 940                                                        | 20.1 $\pm$ 0.2 nM                                                               |
